# Supplementary material for: 46th ISCOS Annual Scientific Meeting
Source: Royal Society of Chemistry journal article supplement (doi:10.1039/d2dt03925g), 2007-01-01
Supplement: d2dt03925g1.pdf [file d2dt03925g1.pdf]

## **Plasmon Au/K-doped defective graphitic carbon nitride for enhanced hydrogen production**

Lu Chen<sup>a\*</sup>, Xiyao Liu<sup>a</sup>, Deling Wang<sup>a</sup>, Yuzhou Xia<sup>a</sup>, Guiyang Yan<sup>a</sup>, Xueyan Huang<sup>b\*</sup>, Xuxu Wang<sup>c\*</sup>

<sup>a</sup> Department of Chemistry, Fujian Province University Key Laboratory of Green Energy and Environment Catalysis, Ningde Normal University, Ningde 352100, PR China

<sup>b</sup> School of Automobile, Fujian Chuanzheng Communications College, Fuzhou, 350002, PR China

<sup>c</sup> State Key Laboratory of Photocatalysis on Energy and Environment, Fuzhou University, Fuzhou 350002, PR China

$$\text{AQY} = \frac{\text{Number of reacted electrons}}{\text{Number of incident photons}} \times 100\%$$

$$= \frac{2 \times C \times N_A}{S \times P \times t \times \frac{\lambda}{h \times c}} \times 100\%$$

Where, C is the H<sub>2</sub> production amount (mol) per hour; N<sub>A</sub> is the Avogadro constant (6.02×10<sup>23</sup> mol<sup>-1</sup>); S is the irradiation area (18 cm<sup>2</sup>); P is the monochromatic light intensity (W·cm<sup>-2</sup>); t is the light irradiation time (3600 s); λ is the wavelength of the monochromatic light (nm); h is the Plank constant (6.626 × 10<sup>-34</sup> J·s); c is the speed of light (3 × 10<sup>8</sup> m·s<sup>-1</sup>).

Table S1 the AQY of Au/KCNx

| λ (monochromatic light) | P (W·cm <sup>-2</sup> ) | C (mmol×10 <sup>-3</sup> ) | AQY  |
|-------------------------|-------------------------|----------------------------|------|
| 420 nm                  | 9.113                   | 0.1333                     | 12.8 |
| 450 nm                  | 8.679                   | 0.054                      | 5.46 |
| 500 nm                  | 4.758                   | 0.00759                    | 1.2  |
| 550 nm                  | 17.28                   | 0.01                       | 0.4  |

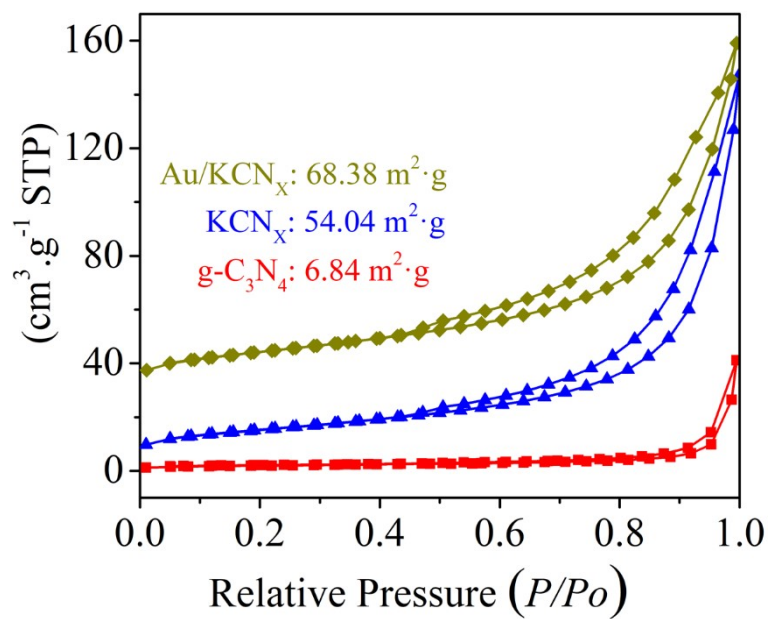

Fig S1:  $\text{N}_2$  adsorption-desorption isotherms of pristine  $\text{g-C}_3\text{N}_4$ ,  $\text{KCN}_x$  and  $\text{Au/KCN}_x$  samples

Table S2 Actual mass content of Au from ICP-OES analysis of the prepared sample

| Sample            | Theoretical proportion (%) | Actual proportion (%) |
|-------------------|----------------------------|-----------------------|
| $\text{Au/KCN}_x$ | 3                          | 2.3                   |

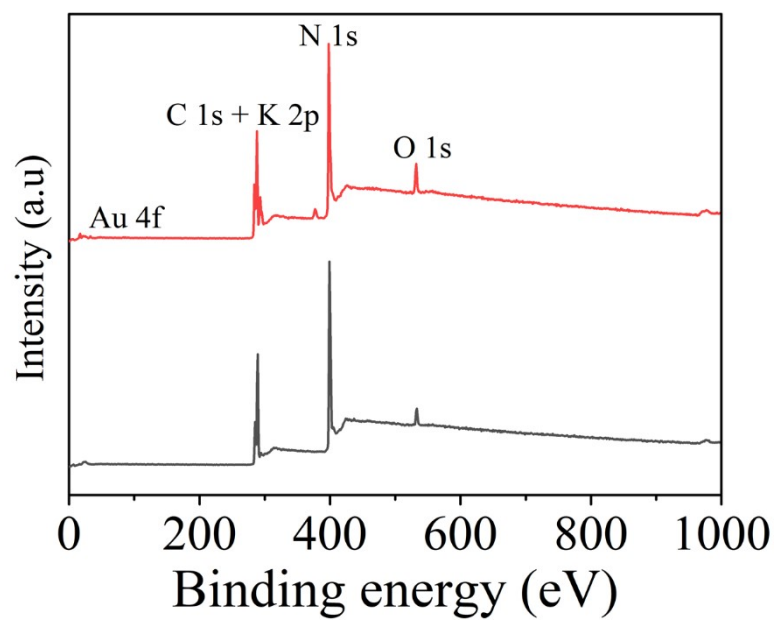

Fig. S2. XPS survey spectra of the as-prepared pristine g-C<sub>3</sub>N<sub>4</sub> and Au/KCN<sub>x</sub> samples.

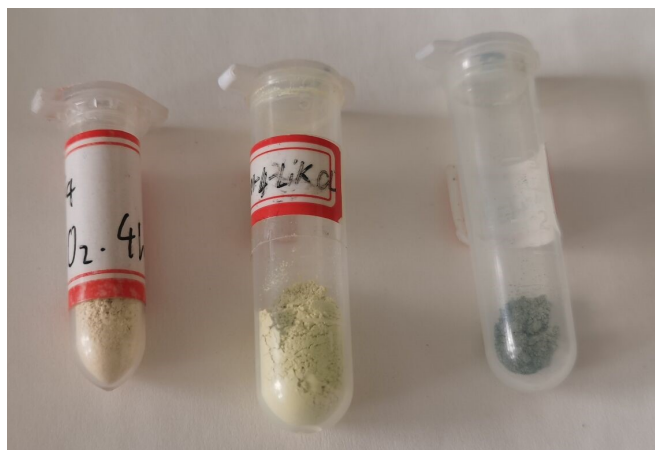

Fig. S3 Digital photographs of the pristine  $g\text{-C}_3\text{N}_4$ , KCN $x$  and Au/KCN $x$  samples
